# Supplementary material for: Age and Acute Ischemic Stroke Outcome in North American Patients With COVID‐19
Source: PubMed Central journal article supplement — J Am Heart Assoc. 2021 Jul 3;10(14):e021046. doi: 10.1161/JAHA.121.021046 (PMC8483479; doi:10.1161/jaha.121.021046), 2021-07-03
Supplement: JAH3-10-e021046-s001.pdf [file JAH3-10-e021046-s001.pdf]

# **SUPPLEMENTAL MATERIAL**

**Table S1. Univariable binary logistic regression analysis showing associations with Modified Rankin Scale (mRS) 0-2 and mortality.**

| Variables                 | Univariate analysis -- mRS 0-2 | Univariate analysis -- mortality |
|---------------------------|--------------------------------|----------------------------------|
|                           | OR (95 CI%, P-value)           |                                  |
| Age (one year increase)   | 0.97 (0.93-0.99, p=0.036)      | 1.03 (1.01-1.06, p=0.028)        |
| Age (56 - 70 vs ≤ 55)     | 0.43 (0.13-1.30, p=0.139)      | 2.92 (1.06-8.74, p=0.044)        |
| Age (> 70 vs ≤ 55)        | 0.33 (0.10-1.01, p=0.057)      | 3.40 (1.25-10.13, p=0.021)       |
| Sex (Male vs female)      | 1.07 (0.42-2.71, p=0.893)      | 1.41 (0.66-3.02, p=0.377)        |
| Race (Caucasian vs Black) | 1.48 (0.50-4.55, p=0.483)      | 0.45 (0.17-1.12, p=0.091)        |
| Race (Others vs Black)    | 0.92 (0.25-3.25, p=0.901)      | 1.30 (0.51-3.37, p=0.580)        |
| Smoking                   | 0.81 (0.17-2.85, p=0.758)      | 2.17 (0.75-6.37, p=0.149)        |
| Atrial fibrillation       | 2.37 (0.73-7.20, p=0.132)      | 1.07 (0.36-3.03, p=0.902)        |
| Prior anticoagulation     | 1.41 (0.36-4.70, p=0.589)      | 1.32 (0.43-4.00, p=0.615)        |
| Coronary artery disease   | 1.52 (0.44-4.62, p=0.479)      | 0.52 (0.16-1.50, p=0.247)        |
| Congestive heart failure  | 1.73 (0.43-5.99, p=0.405)      | 0.87 (0.25-2.80, p=0.812)        |
| Diabetes mellitus         | 0.40 (0.13-1.06, p=0.078)      | 3.71 (1.69-8.41, p=0.001)        |
| Hypertension              | 0.35 (0.13-0.94, p=0.034)      | 1.36 (0.57-3.37, p=0.496)        |
| Hyperlipidemia            | 0.90 (0.35-2.34, p=0.835)      | 1.09 (0.50-2.39, p=0.829)        |
| Previous stroke           | 2.42 (0.88-6.58, p=0.082)      | 1.67 (0.69-4.04, p=0.257)        |
| Chronic kidney disease    | 1.37 (0.44-3.91, p=0.570)      | 0.60 (0.21-1.54, p=0.300)        |
| Admission NIHSS score     | 0.78 (0.68-0.87, p<0.001)      | 1.08 (1.03-1.13, p=0.001)        |
| ASPECTS (6-10 vs 5-0)     | 3.55 (0.61-67.62, p=0.245)     | 0.34 (0.10-1.05, p=0.063)        |
| IV tPA                    | 1.19 (0.41-3.21, p=0.733)      | 0.62 (0.24-1.50, p=0.302)        |
| High dose enoxaparin      | 2.56 (0.29-22.88, p=0.367)     | 0.51 (0.03-3.75, p=0.561)        |
| Thrombectomy              | 0.38 (0.08-1.25, p=0.145)      | 1.08 (0.42-2.66, p=0.873)        |

NIHSS: National Institutes of Health Stroke Scale; ASPECTS: The Alberta Stroke Program Early CT Score; IV tPA: Intravenous tissue plasminogen activator
